# Supplementary material for: Somatostatin-type and allatostatin-C–type neuropeptides are paralogous and have opposing myoregulatory roles in an echinoderm
Source: PubMed Central journal article supplement (PMC8851493; doi:10.1073/pnas.2113589119), 2022-02-10
Supplement: pnas.2113589119.sapp.pdf [file pnas.2113589119.sapp.pdf]

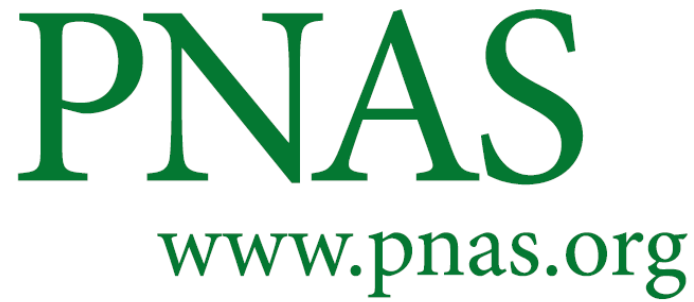

## Supplementary Information for

Somatostatin-type and allatostatin-C-type neuropeptides are paralogous and have opposing myoregulatory roles in an echinoderm

Ya Zhang<sup>1</sup>, Luis Alfonso Yañez Guerra<sup>1,2</sup>, Ana B. Tinoco<sup>1</sup>, Nayeli Escudero Castelán<sup>1</sup>, Michaela Egertová<sup>1</sup>, Maurice R. Elphick<sup>1\*</sup>

1. School of Biological and Behavioural Sciences, Queen Mary University of London, London E1 4NS, UK

2. Present address: Living Systems Institute, University of Exeter, Exeter EX4 4QD, UK

\*Corresponding author: Maurice R. Elphick.

**Email:** [m.r.elphick@qmul.ac.uk](mailto:m.r.elphick@qmul.ac.uk)

### This includes:

Figures S1-S4

Tables S1-S3

SI References

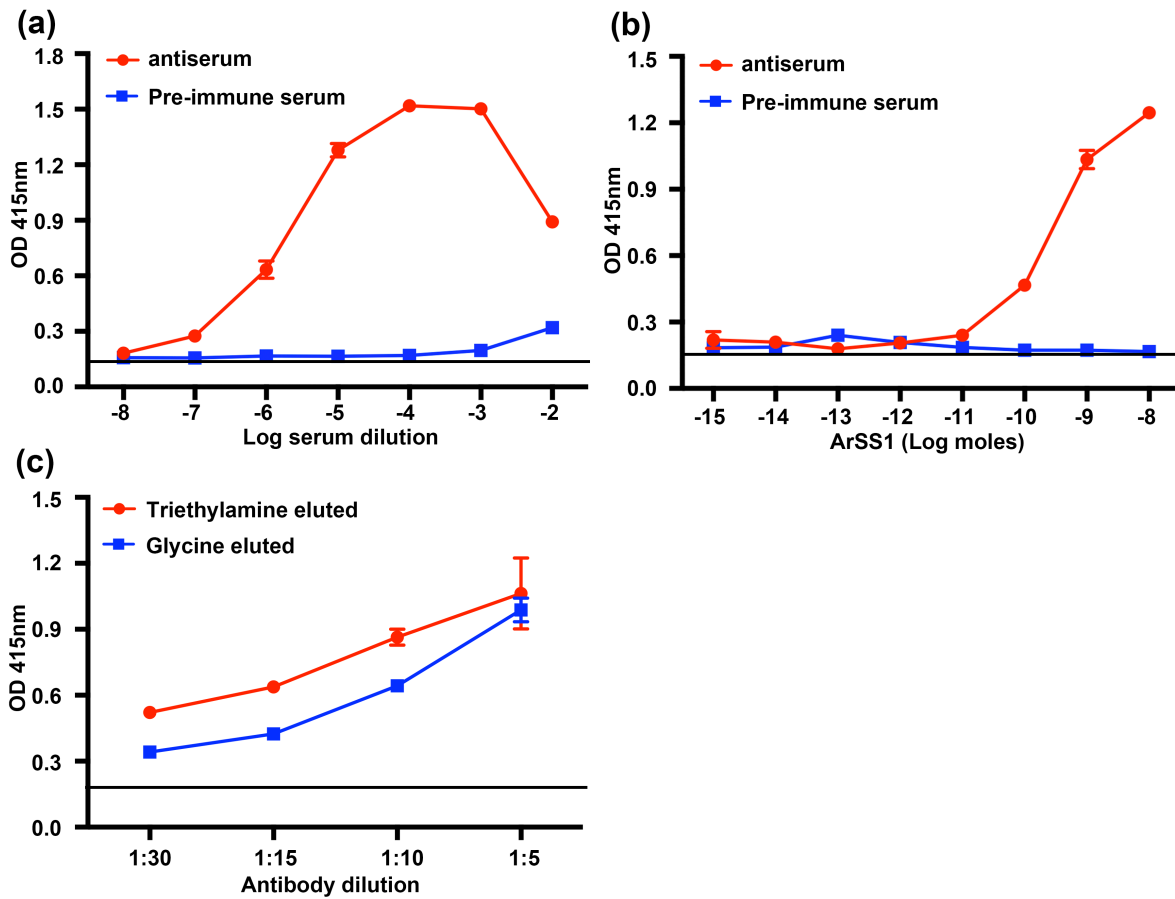

**Fig. S1. Characterization of rabbit antiserum and affinity-purified rabbit antibodies to ArSS1 using an enzyme-linked immunosorbent assay (ELISA).** (a) Incubation of antiserum (red) and pre-immune serum (blue) at dilutions between  $10^{-8}$  and  $10^{-2}$  with 0.1 nmol of ArSS1 reveals that absorbance values with the pre-immune serum are indistinguishable from the blank control without serum (black line), with the antiserum immunoreaction observed with dilutions from  $10^{-7}$  to  $10^{-2}$ . (b) Incubation of antiserum (red) and pre-immune serum (blue) at  $10^{-4}$  dilution with between  $10^{-15}$  and  $10^{-8}$  moles of ArSS1 reveals that absorbance values with the pre-immune serum are indistinguishable from the blank control without serum (black line), with the antiserum immunoreaction observed with  $10^{-10}$  to  $10^{-8}$  moles of ArSS1. (c) Incubation of affinity-purified antibodies with 0.1 nmol of ArSS1 reveals that antibodies to ArSS1 can be detected in the trimethylamine eluate (red) and the glycine eluate (black) with dilutions from 1:30 to 1:5. The absorbance values with affinity-purified antibodies are distinguishably higher than the blank control (5 % goat serum/PBST; black line). All data points are mean values from two separate experiments performed in duplicate.

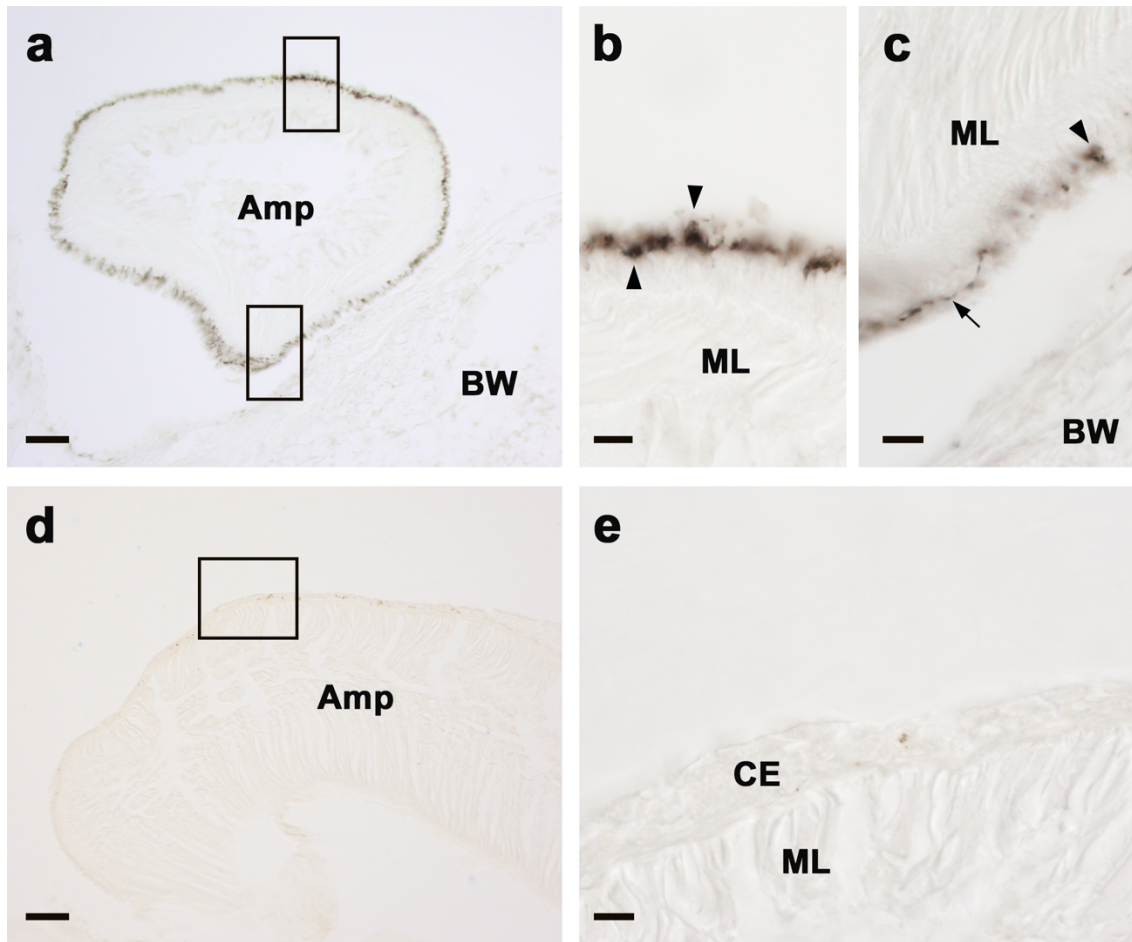

**Fig. S2. Comparative immunohistochemical analysis of ArSS1 and ArSS2 expression in tube foot ampullae of *A. rubens*.** (a) Transverse section of an arm showing ArSS1-immunoreactivity (immunostaining) in the coelomic epithelial layer of an ampulla. (b) Higher magnification image of the boxed upper region of (a), showing immunostained cells (arrowheads) in the coelomic epithelial layer. (c) Higher magnification image of the boxed lower region of (a), showing an immunostained cell (arrowhead) and varicose fibre (arrow) in the coelomic epithelial layer. (d) Transverse section of an arm showing absence of ArSS2 immunostaining in an ampulla. (e) Higher magnification image of the boxed region in (d), showing absence of ArSS2 immunostaining in the coelomic epithelial layer and the muscle layer of the ampulla. Abbreviations: Amp, ampulla; BW, body wall; CE, coelomic epithelium; ML, muscle layer. Scale bars: 6  $\mu\text{m}$  in (b), (c), (e); 32  $\mu\text{m}$  in (a), (d).

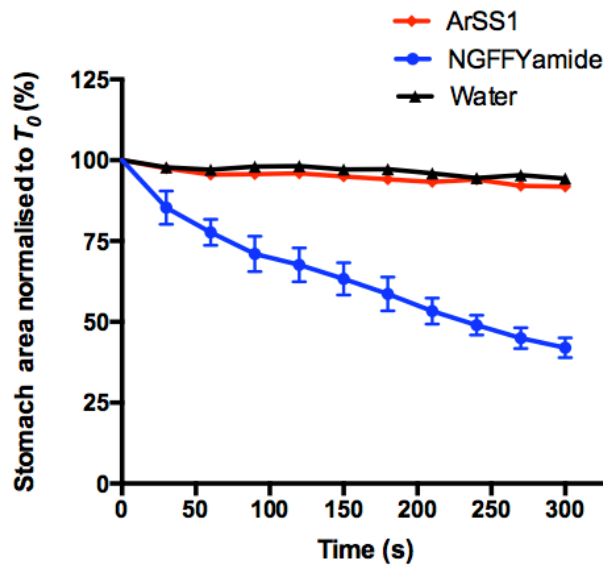

**Fig. S3. ArSS1 does not induce cardiac stomach retraction in *A. rubens*.** Retraction of the cardiac stomach was quantified by determining the area of the everted stomach as a percentage of the area of cardiac stomach everted at the time of injection (Time 0;  $T_0$ ). The graph shows the mean area ( $\pm$  SEM) of the everted cardiac stomach expressed as a percentage of the area at  $T_0$  and at 50 s intervals over a five-minute period following injection of distilled water (black;  $n = 6$ ), 10  $\mu$ l 1 mM ArSS1 (red;  $n = 6$ ) or 10  $\mu$ l 100 nmol NGFFYamide (blue;  $n = 3$ ). Statistical analysis of these data by using mixed-effect regression model revealed no significance difference in slope between injection with ArSS1 and injection with water ( $p = 0.0758$ ). In contrast NGFFYamide (used here as a positive control) clearly triggers cardiac stomach retraction, with significant difference in slope to injection with water or ArSS1 ( $p < 0.0001$ ).

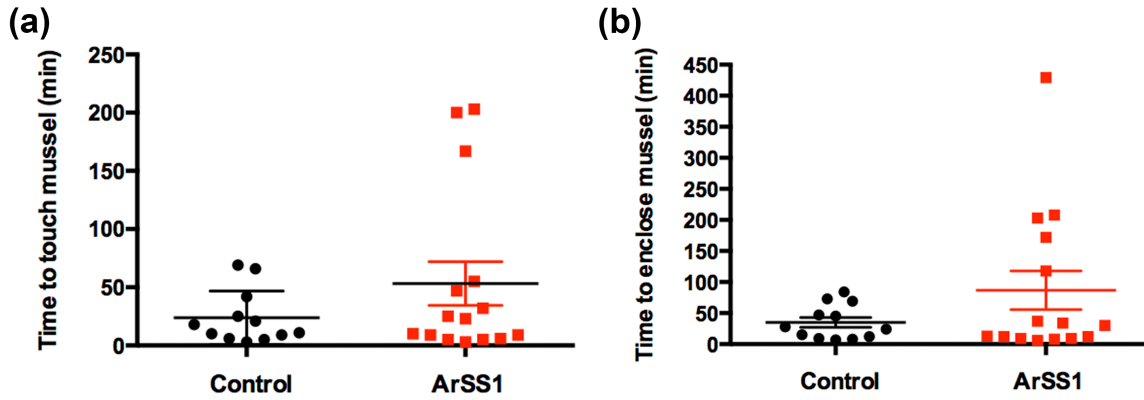

**Fig. S4.** (a) Injection of 10  $\mu\text{l}$  of  $10^{-3}$  M ArSS1 (red;  $n=15$ ) did not cause a significant difference (t-test;  $p = 0.1905$ ) in the time elapsed (minutes) before starfish touch a mussel in comparison with a control group injected with distilled water (black;  $n=12$ ). (b) Injection of 10  $\mu\text{l}$  of  $10^{-3}$  M ArSS1 (red;  $n=15$ ) did not cause a significant difference (t-test;  $p = 0.1605$ ) in the time elapsed (minutes) before starfish enclose a mussel in comparison with a control group injected with distilled water (black;  $n=12$ ). Data are shown as scatter plots and were analysed statistically using a two-tailed Student's t-test in Prism 6.

**Table S1.** Accession numbers of the precursor sequences used for the neuropeptide alignment in Figure 1.

| <b>Species name</b>                  | <b>Neuropeptide precursor name</b> | <b>Accession number or reference</b> |
|--------------------------------------|------------------------------------|--------------------------------------|
| <i>Asterias rubens</i>               | Somatostatin1                      | ALJ99950.1                           |
| <i>Acanthaster planci</i>            | Somatostatin1                      | XP_022111848.1                       |
| <i>Ophionotus victoriae</i>          | Somatostatin1                      | XP_001176809.1                       |
| <i>Strongylocentrotus purpuratus</i> | Somatostatin1                      | (1)                                  |
| <i>Apostichopus japonicus</i>        | Somatostatin1                      | AWU78771.1                           |
| <i>Drosophila melanogaster</i>       | Allatostatin C                     | NP_001162948.1                       |
| <i>Limulus polyphemus</i>            | Allatostatin C                     | XP_022249713.1                       |
| <i>Drosophila melanogaster</i>       | Allatostatin CC                    | NP_609483.2                          |
| <i>Limulus polyphemus</i>            | Allatostatin CC                    | (2)                                  |
| <i>Limulus polyphemus</i>            | Allatostatin CCC                   | (2)                                  |
| <i>Caenorhabditis elegans</i>        | Allatostatin C1                    | (3)                                  |
| <i>Caenorhabditis elegans</i>        | Allatostatin C2                    | (3)                                  |
| <i>Caenorhabditis elegans</i>        | Allatostatin C3                    | (3)                                  |
| <i>Caenorhabditis elegans</i>        | Allatostatin C4                    | (3)                                  |
| <i>Caenorhabditis elegans</i>        | Allatostatin C5                    | (3)                                  |
| <i>Caenorhabditis elegans</i>        | Allatostatin C6                    | (4)                                  |
| <i>Caenorhabditis elegans</i>        | Allatostatin C7                    | (4)                                  |
| <i>Caenorhabditis elegans</i>        | Allatostatin C8                    | (5)                                  |
| <i>Caenorhabditis elegans</i>        | Allatostatin C9                    | (5)                                  |
| <i>Caenorhabditis elegans</i>        | Allatostatin C10                   | (5)                                  |
| <i>Caenorhabditis elegans</i>        | Allatostatin C11                   | (5)                                  |
| <i>Helobdella robusta</i>            | Allatostatin C                     | (3)                                  |
| <i>Platynereis dumerilii</i>         | Allatostatin C                     | AHB62362.1                           |
| <i>Deroceras reticulatum</i>         | Allatostatin C                     | ARS01353                             |
| <i>Charonia tritonis</i>             | Allatostatin C                     | AQS80487                             |
| <i>Pecten Maximus</i>                | Allatostatin C                     | XP_033764281                         |
| <i>Crassostrea gigas</i>             | Allatostatin C                     | XP_011412814                         |
| <i>Lottia gigantea</i>               | Allatostatin C                     | (3)                                  |
| <i>Lingula anatine</i>               | Allatostatin C                     | XP_013393587.1                       |
| <i>Lineus longissimus</i>            | Allatostatin C1                    | (6)                                  |
| <i>Lineus longissimus</i>            | Allatostatin C2                    | (6)                                  |
| <i>Asterias rubens</i>               | Somatostatin 2                     | MN257487                             |
| <i>Acanthaster planci</i>            | Somatostatin 2                     | gbr.24.36.t1                         |
| <i>Ophionotus victoriae</i>          | Somatostatin 2                     | (1)                                  |
| <i>Strongylocentrotus purpuratus</i> | Somatostatin 2                     | (1)                                  |
| <i>Apostichopus japonicus</i>        | Somatostatin 2                     | (1)                                  |
| <i>Branchiostoma floridae</i>        | Somatostatin                       | (7)                                  |
| <i>Homo sapiens</i>                  | Somatostatin                       | NP_001039.1                          |
| <i>Mus musculus</i>                  | Somatostatin                       | NM_009215.1                          |
| <i>Gallus gallus</i>                 | Somatostatin                       | CN210817.1                           |
| <i>Danio rerio</i>                   | Somatostatin                       | AAH76254.1                           |
| <i>Oryzias latipes</i>               | Somatostatin                       | (8)                                  |
| <i>Takifugu rubripes</i>             | Somatostatin                       | (8)                                  |
| <i>Homo sapiens</i>                  | Somatostatin (CST)                 | AF013252                             |
| <i>Mus musculus</i>                  | Somatostatin                       | AF050156.1                           |
| <i>Gallus gallus</i>                 | Somatostatin                       | (8)                                  |
| <i>Danio rerio</i>                   | Somatostatin                       | (8)                                  |
| <i>Oryzias latipes</i>               | Somatostatin                       | (8)                                  |

|                             |              |     |
|-----------------------------|--------------|-----|
| <i>Takifugu rubripes</i>    | Somatostatin | (8) |
| <i>Danio rerio</i>          | Somatostatin | (8) |
| <i>Oryzias latipes</i>      | Somatostatin | (8) |
| <i>Takifugu rubripes</i>    | Somatostatin | (8) |
| <i>Lepisosteus oculatus</i> | Somatostatin | (8) |
| <i>Lycopus americanus</i>   | Somatostatin | (8) |
| <i>Danio rerio</i>          | Somatostatin | (8) |
| <i>Oryzias latipes</i>      | Somatostatin | (8) |
| <i>Takifugu rubripes</i>    | Somatostatin | (8) |
| <i>Danio rerio</i>          | Somatostatin | (8) |
| <i>Oryzias latipes</i>      | Somatostatin | (8) |
| <i>Takifugu rubripes</i>    | Somatostatin | (8) |
| <i>Danio rerio</i>          | Somatostatin | (8) |
| <i>Lepisosteus oculatus</i> | Somatostatin | (8) |

**Table S2.** Accession numbers of the sequences used for CLANS analysis in Figure 2.

| <b>Species name</b>            | <b>Gene name</b> | <b>Accession number or reference</b> |
|--------------------------------|------------------|--------------------------------------|
| <i>Homo sapiens</i>            | SS               | NP_001039.1                          |
| <i>Homo sapiens</i>            | CST              | NP_001293.3                          |
| <i>Ficedula albicollis</i>     | SS               | ENSFALT00000007767.1                 |
| <i>Gallus gallus</i>           | SS               | CN210817.1                           |
| <i>Anolis carolinensis</i>     | SS               | XP_003228868                         |
| <i>Pelodiscus sinensis</i>     | SS               | ENSPSIT00000016437.1                 |
| <i>Pelophylax ridibundus</i>   | SS               | P87384.1                             |
| <i>Latimeria chalumnae</i>     | SS               | XP_005992512.1                       |
| <i>Protopterus annectens</i>   | SS               | AAD39138.1                           |
| <i>Epinephelus coioides</i>    | SS               | AAU93565.1                           |
| <i>Fundulus heteroclitus</i>   | SS               | EV461374.1                           |
| <i>Gadus morhua</i>            | SS               | AAZ85702.1                           |
| <i>Gasterosteus aculeatus</i>  | SS               | KT235748                             |
| <i>Haplochromis burtoni</i>    | SS               | AAS97964.1                           |
| <i>Lophius americanus</i>      | SS               | P01169.1                             |
| <i>Oncorhynchus mykiss</i>     | SS               | CA364601.1                           |
| <i>Oryzias latipes</i>         | SS               | XP_004084505.1                       |
| <i>Poecilia formosa</i>        | SS               | ENSPFOT00000005658.1                 |
| <i>Salmo salar</i>             | SS               | CB509644.1                           |
| <i>Takifugu rubripes</i>       | SS               | ENSTRUG00000010048                   |
| <i>Tetraodon nigroviridis</i>  | SS               | KT235747                             |
| <i>Astyanax mexicanus</i>      | SS               | ENSAMXT00000006698.1                 |
| <i>Carassius auratus</i>       | SS               | Q9YGH5.1                             |
| <i>Chitala chitala</i>         | SS               | AAK97070.2                           |
| <i>Clupea harengus</i>         | SS               | XP_012673158.1                       |
| <i>Danio rerio</i>             | SS               | AAH76254.1                           |
| <i>Gnathonemus petersii</i>    | SS               | AF292652                             |
| <i>Ictalurus punctatus</i>     | SS               | CAA23877.1                           |
| <i>Megalobrama pellegrini</i>  | SS               | AAO92644.1                           |
| <i>Pygocentrus nattereri</i>   | SS               | XP_017539070.1                       |
| <i>Acipenser transmontanus</i> | SS               | AAL13248.1                           |
| <i>Acipenser sinensis</i>      | SS               | FJ792687.1                           |
| <i>Lepisosteus oculatus</i>    | SS               | XP_006637937.1                       |
| <i>Callorhynchus milii</i>     | SS               | XP_007910586.1                       |
| <i>Rhincodon typus</i>         | SS               | XP_020365362.1                       |



|                                 |    |                      |
|---------------------------------|----|----------------------|
| <i>Scylorhinus canicula</i>     | SS | JX964750             |
| <i>Macaca fascicularis</i>      | SS | XP 015298230         |
| <i>Bos taurus</i>               | SS | NP 001191825         |
| <i>Mus musculus</i>             | SS | AAD51127.1           |
| <i>Sus scrofa</i>               | SS | NP 001191865         |
| <i>Anolis carolinensis</i>      | SS | XP 008119733.1       |
| <i>Latimeria chalumnae</i>      | SS | XP_006001361.1       |
| <i>Astyanax mexicanus</i>       | SS | ENSAMXT00000013558.1 |
| <i>Clupea harengus</i>          | SS | XP 012681486.1       |
| <i>Danio rerio</i>              | SS | ENSDART00000146411.2 |
| <i>Ictalurus punctatus</i>      | SS | XP 017341959.1       |
| <i>Pygocentrus nattereri</i>    | SS | XM 017706353.1       |
| <i>Lepisosteus oculatus</i>     | SS | NC023203.1           |
| <i>Callorhynchus milii</i>      | SS | XP 007900347.1       |
| <i>Rhincodon typus</i>          | SS | XP 020390988.1       |
| <i>Scyliorhinus canicula</i>    | SS | MK491629             |
| <i>Epinephelus coioides</i>     | SS | AAU93566.1           |
| <i>Gasterosteus aculeatus</i>   | SS | KT235756             |
| <i>Lycopus americanus</i>       | SS | P01170.2             |
| <i>Oncorhynchus mykiss</i>      | SS | Q91194.1             |
| <i>Oryzias latipes</i>          | SS | AU168379.1           |
| <i>Poecilotheria formosa</i>    | SS | ENSPFOT00000005672.2 |
| <i>Salmo salar</i>              | SS | DW531645.1           |
| <i>Salmo salar</i>              | SS | CB505007.1           |
| <i>Takifugu rubripes</i>        | SS | ENSTRUT00000025350.1 |
| <i>Tetraodon nigroviridis</i>   | SS | ENSTNIT00000001563.1 |
| <i>Xiphophorus maculatus</i>    | SS | XP_005808296.2       |
| <i>Ambystoma mexicanum</i>      | SS | ENSAMXT00000006711.1 |
| <i>Carassius auratus</i>        | SS | AAF15306.1           |
| <i>Catostomus commersonii</i>   | SS | AAK97071.2           |
| <i>Chitala chitala</i>          | SS | AAV48555.1           |
| <i>Clupea harengus</i>          | SS | XP 012693360.1       |
| <i>Ctenopharyngodon idella</i>  | SS | ACB69424.1           |
| <i>Danio rerio</i>              | SS | XP 694143.1          |
| <i>Ictalurus punctatus</i>      | SS | CK424149.1           |
| <i>Gnathonemus petersii</i>     | SS | AAV48556.1           |
| <i>Osteoglossum bicirrhosum</i> | SS | AAK97067.1           |
| <i>Pantodon buchholzi</i>       | SS | AAK97068.2           |
| <i>Pygocentrus nattereri</i>    | SS | XP 017539071.1       |

|                               |    |                      |
|-------------------------------|----|----------------------|
| <i>Lepisosteus oculatus</i>   | SS | ENSLOCT00000011545.1 |
| <i>Callorhynchus milii</i>    | SS | XP_007910587.1       |
| <i>Rhincodon typus</i>        | SS | XP_020365363.1       |
| <i>Scyliorhinus canicula</i>  | SS | MK491630             |
| <i>Gasterosteus aculeatus</i> | SS | KT235754             |
| <i>Oryzias latipes</i>        | SS | KT235752             |
| <i>Salmo salar</i>            | SS | CA039604.1           |
| <i>Takifugu rubripes</i>      | SS | NC018911.1           |
| <i>Tetraodon nigroviridis</i> | SS | KT235753             |
| <i>Danio rerio</i>            | SS | NP_571802.1          |
| <i>Ictalurus punctatus</i>    | SS | P01172.1             |
| <i>Lepisosteus oculatus</i>   | SS | ENSLOCT00000011651.1 |
| <i>Latimeria chalumnae</i>    | SS | XP_005999859.1       |
| <i>Gasterosteus aculeatus</i> | SS | ALD51533.1           |
| <i>Oncorhynchus nerka</i>     | SS | EV380196.1           |
| <i>Oreochromis niloticus</i>  | SS | XP_005464163.1       |
| <i>Oryzias latipes</i>        | SS | XP_020567335.1       |
| <i>Poecilotheria formosa</i>  | SS | XP_007551472.1       |
| <i>Takifugu rubripes</i>      | SS | XP_003968367.1       |
| <i>Tetraodon nigroviridis</i> | SS | ALD51532.1           |
| <i>Xiphophorus maculatus</i>  | SS | XP_005804860.3       |
| <i>Ambystoma mexicanum</i>    | SS | XP_007243346.1       |
| <i>Danio rerio</i>            | SS | XP_001333082.1       |
| <i>Ictalurus punctatus</i>    | SS | XP_017327476.1       |
| <i>Pimephales promelas</i>    | SS | DT105503.1           |
| <i>Pygocentrus nattereri</i>  | SS | XP_017578562.1       |
| <i>Lepisosteus oculatus</i>   | SS | XP_006627411.2       |
| <i>Scyliorhinus canicula</i>  | SS | JX964751             |
| <i>Anas platyrhynchos</i>     | SS | XP_005021334.1       |
| <i>Taeniopygia guttata</i>    | SS | NP_001232404.1       |
| <i>Latimeria chalumnae</i>    | SS | XP_005994063.1       |
| <i>Protopterus annectens</i>  | SS | Q9W7E9.1             |
| <i>Epinephelus coioides</i>   | SS | AAU93567.1           |
| <i>Gadus Morhua</i>           | SS | XP_030211281.1       |
| <i>Gasterosteus aculeatus</i> | SS | ENSGACG00000007077   |
| <i>Oncorhynchus mykiss</i>    | SS | CX153272.1           |
| <i>Osmerus mordax</i>         | SS | EL519905.1           |
| <i>Takifugu rubripes</i>      | SS | ENSTRUG00000012370   |
| <i>Tetraodon nigroviridis</i> | SS | ENSTNIG00000015178   |

|                                      |        |                      |
|--------------------------------------|--------|----------------------|
| <i>Astyanax mexicanus</i>            | SS     | ENSAMXT00000013526.1 |
| <i>Carassius auratus</i>             | SS     | AAD09631.1           |
| <i>Clupea harengus</i>               | SS     | XP_012681579.1       |
| <i>Ctenopharyngodon idella</i>       | SS     | ACB69425.1           |
| <i>Ictalurus punctatus</i>           | SS     | XP_017343581.1       |
| <i>Pimephales promelas</i>           | SS     | DT250237.1           |
| <i>Acipenser transmontanus</i>       | SS     | AAL13249.1           |
| <i>Lepisosteus oculatus</i>          | SS     | XP_006642047.1       |
| <i>Callorhinchus milii</i>           | SS     | XP_007895974.1       |
| <i>Rhincodon typus</i>               | SS     | XP_020368528.1       |
| <i>Scyliorhinus canicula</i>         | SS     | JX964752             |
| <i>Branchiostoma floridae</i>        | SS     | (7)                  |
| <i>Asterias rubens</i>               | SS     | MN257487             |
| <i>Acanthaster planci</i>            | SS     | gbr.24.36.t1         |
| <i>Ophionotus victoriae</i>          | SS     | (1)                  |
| <i>Strongylocentrotus purpuratus</i> | SS     | (1)                  |
| <i>Apostichopus japonicus</i>        | SS     | (1)                  |
| <i>Asterias rubens</i>               | SS     | ALJ99950.1           |
| <i>Acanthaster planci</i>            | SS     | XP_022111848.1       |
| <i>Ophionotus victoriae</i>          | SS     | XP_001176809.1       |
| <i>Strongylocentrotus purpuratus</i> | SS     | (1)                  |
| <i>Apostichopus japonicus</i>        | SS     | AWU78771.1           |
| <i>Capitella teleta</i>              | ASTC   | (3)                  |
| <i>Helobdella robusta</i>            | ASTC   | (3)                  |
| <i>Lottia gigantea</i>               | ASTC   | (3)                  |
| <i>Crassostrea gigas</i>             | ASTC   | (3)                  |
| <i>Daphnia pulex</i>                 | ASTC   | (3)                  |
| <i>Tribolium castaneum</i>           | ASTC   | (3)                  |
| <i>Caenorhabditis elegans</i>        | ASTC1  | (3)                  |
| <i>Caenorhabditis elegans</i>        | ASTC2  | (3)                  |
| <i>Caenorhabditis elegans</i>        | ASTC3  | (3)                  |
| <i>Caenorhabditis elegans</i>        | ASTC4  | (3)                  |
| <i>Caenorhabditis elegans</i>        | ASTC5  | (3)                  |
| <i>Caenorhabditis elegans</i>        | ASTC6  | (4)                  |
| <i>Caenorhabditis elegans</i>        | ASTC7  | (4)                  |
| <i>Caenorhabditis elegans</i>        | ASTC8  | (5)                  |
| <i>Caenorhabditis elegans</i>        | ASTC9  | (5)                  |
| <i>Caenorhabditis elegans</i>        | ASTC10 | (5)                  |
| <i>Caenorhabditis elegans</i>        | ASTC11 | (5)                  |

|                                   |        |                |
|-----------------------------------|--------|----------------|
| <i>Drosophila melanogaster</i>    | ASTCC  | NP_609483.2    |
| <i>Drosophila melanogaster</i>    | ASTC   | NP_001162948.1 |
| <i>Strigamia maritima</i>         | ASTC   | (2)            |
| <i>Strigamia maritima</i>         | ASTCC  | (2)            |
| <i>Strigamia maritima</i>         | ASTCCC | (2)            |
| <i>Frankliniella occidentalis</i> | ASTC   | KAE8745392.1   |
| <i>Nasonia vitripennis</i>        | ASTC   | ADM26612.1     |
| <i>Odontomachus brunneus</i>      | ASTC   | XP_032688105.1 |
| <i>Cydia pomonella</i>            | ASTC   | QDK59880.1     |
| <i>Formica exsecta</i>            | ASTC   | XP_029677371.1 |
| <i>Acyrtosiphon pisum</i>         | ASTC   | XP_003244026.1 |
| <i>Nylanderia fulva</i>           | ASTC   | XP_029159605.1 |
| <i>Ooceraea biroi</i>             | ASTC   | XP_011338324.1 |
| <i>Mizuhopecten yessoensis</i>    | ASTC   | AXN93471.1     |
| <i>Camponotus floridanus</i>      | ASTC   | XP_011252628.1 |
| <i>Harpegnathos saltator</i>      | ASTC   | XP_011138699.1 |
| <i>Plautia stali</i>              | ASTC   | BAV78790.1     |
| <i>Aplysia californica</i>        | ASTC   | ADX20596.1     |
| <i>Neocaridina denticulata</i>    | ASTC   | AIY69122.1     |
| <i>Nilaparvata lugens</i>         | ASTC   | BAO00971.1     |
| <i>Helicoverpa armigera</i>       | ASTC   | AGH25547.1     |
| <i>Tribolium castaneum</i>        | ASTC   | EFA09152.2     |
| <i>Bombyx mori</i>                | ASTC   | NP_001124356.1 |
| <i>Clostera anastomosis</i>       | ASTC   | AEM44669.1     |
| <i>Scylla paramamosain</i>        | ASTC   | QDQ19208.1     |
| <i>Charonia tritonis</i>          | ASTC   | AQS80487       |
| <i>Deroceras reticulatum</i>      | ASTC   | ARS01353       |
| <i>Aplysia californica</i>        | ASTC   | XP_005112794_1 |
| <i>Crassostrea gigas</i>          | ASTC   | XP_011412814   |
| <i>Crassostrea virginica</i>      | ASTC   | XP_022344895_1 |
| <i>Pecten maximus</i>             | ASTC   | XP_033764281   |
| <i>Mizuhopecten yessoensis</i>    | ASTC   | XP_021356393_1 |
| <i>Neocaridina denticulata</i>    | ASTC   | AIY69122_1     |
| <i>Penaeus vannamei</i>           | ASTC   | XP_027213118_1 |
| <i>Pandalus japonicus</i>         | ASTC   | AFV91540_1     |
| <i>Scylla paramamosain</i>        | ASTC   | QDQ19208_1     |
| <i>Hyalella azteca</i>            | ASTC   | XP_018013863_1 |
| <i>Trinorchestia longiramus</i>   | ASTC   | KAF2351638_1   |
| <i>Trinorchestia longiramus</i>   | ASTC   | KAF2358496_1   |

|                                      |       |                |
|--------------------------------------|-------|----------------|
| <i>Ctenocephalides felis</i>         | ASTC  | XP_026481520_1 |
| <i>Clunio marinus</i>                | ASTC  | CRK94328_1     |
| <i>Amphibalanus amphitrite</i>       | ASTC  | KAF0305242_1   |
| <i>Limulus polyphemus</i>            | ASTC  | XP_022249713_1 |
| <i>Lychas mucronatus</i>             | ASTC  | ABY26679_1     |
| <i>Thrips palmi</i>                  | ASTC  | XP_034242426_1 |
| <i>Propillocerus akamusi</i>         | ASTC  | QGW50614_1     |
| <i>Drosophila albomicans</i>         | ASTC  | XP_034098787_1 |
| <i>Stomoxys calcitrans</i>           | ASTC  | XP_013118248_1 |
| <i>Frankliniella occidentalis</i>    | ASTC  | XP_026282364_1 |
| <i>Drosophila kikkawai</i>           | ASTC  | XP_017032718_1 |
| <i>Drosophila kikkawai</i>           | ASTC  | XP_017032715_1 |
| <i>Varroa jacobsoni</i>              | ASTC  | XP_022691927_1 |
| <i>Drosophila obscura</i>            | ASTC  | XP_022214727_1 |
| <i>Drosophila grimshawi</i>          | ASTC  | EDW03810_1     |
| <i>Drosophila takahashii</i>         | ASTC  | XP_017014908_1 |
| <i>Aedes albopictus</i>              | ASTC  | XP_029729533_1 |
| <i>Drosophila ananassae</i>          | ASTC  | XP_014761510_1 |
| <i>Drosophila elegans</i>            | ASTC  | XP_017110281_1 |
| <i>Drosophila eugracilis</i>         | ASTC  | XP_017076362_1 |
| <i>Drosophila ficusphila</i>         | ASTC  | XP_017059357_1 |
| <i>Drosophila innubila</i>           | ASTC  | XP_034474889_1 |
| <i>Scaptodrosophila lebanonensis</i> | ASTC  | XP_030384485_1 |
| <i>Musca domestica</i>               | ASTC  | XP_005184918_1 |
| <i>Anopheles gambiae</i>             | ASTC  | XP_001689183_1 |
| <i>Anopheles darlingi</i>            | ASTC  | ETN61475_1     |
| <i>Photinus pyralis</i>              | ASTC  | KAB0794209_1   |
| <i>Sarcophaga bullata</i>            | ASTC  | TMW48585_1     |
| <i>Drosophila arizonae</i>           | ASTC  | XP_017858602_1 |
| <i>Drosophila busckii</i>            | ASTC  | XP_017848162_1 |
| <i>Tribolium castaneum</i>           | ASTC  | NP_001137205_1 |
| <i>Galendromus occidentalis</i>      | ASTC  | XP_018495151_1 |
| <i>Limulus polyphemus</i>            | ASTCC | (2)            |
| <i>Anopheles sinensis</i>            | ASTC  | KFB49259_1     |
| <i>Drosophila mauritiana</i>         | ASTC  | XP_033161907_1 |
| <i>Drosophila willistoni</i>         | ASTC  | XP_002067656_1 |
| <i>Zeugodacus cucurbitae</i>         | ASTC  | XP_011178321_1 |
| <i>Bactrocera oleae</i>              | ASTC  | XP_014086382_1 |
| <i>Bactrocera latifrons</i>          | ASTC  | XP_018787536_1 |

|                                  |        |                |
|----------------------------------|--------|----------------|
| <i>Limulus polyphemus</i>        | ASTCCC | (2)            |
| <i>Stegodyphus dumicola</i>      | ASTC   | XP_035230852_1 |
| <i>Samia ricini</i>              | ASTC   | AAAY68369_1    |
| <i>Stegodyphus mimosarum</i>     | ASTC   | KFM78946_1     |
| <i>Drosophila virilis</i>        | ASTC   | XP_002051772_1 |
| <i>Bactrocera oleae</i>          | ASTC   | XP_014086384_1 |
| <i>Vanessa tameamea</i>          | ASTC   | XP_026492179_1 |
| <i>Ceratitis capitata</i>        | ASTC   | XP_020714951_1 |
| <i>Amyelois transitella</i>      | ASTC   | XP_013186846_1 |
| <i>Clostera anastomosis</i>      | ASTCC  | (9)            |
| <i>Apis mellifera</i>            | ASTCC  | (10)           |
| <i>Apis mellifera</i>            | ASTCCC | (2)            |
| <i>Arctia plantaginis</i>        | ASTC   | CAB3261401_1   |
| <i>Ostrinia furnacalis</i>       | ASTC   | XP_028171302_1 |
| <i>Plutella xylostella</i>       | ASTC   | NP_001295989_1 |
| <i>Chilo suppressalis</i>        | ASTC   | ALM30301_1     |
| <i>Spodoptera frugiperda</i>     | ASTC   | Q868F8_1       |
| <i>Hyposmocoma kahamanoa</i>     | ASTC   | XP_026327560_1 |
| <i>Aphantopus hyperantus</i>     | ASTC   | XP_034831767_1 |
| <i>Heliothis virescens</i>       | ASTC   | PCG77404_1     |
| <i>Bombyx mandarina</i>          | ASTC   | XP_028043051_1 |
| <i>Bicyclus anynana</i>          | ASTC   | XP_023936107_1 |
| <i>Galleria mellonella</i>       | ASTC   | XP_026761889_1 |
| <i>Operophtera brumata</i>       | ASTC   | KOB78759_1     |
| <i>Papilio xuthus</i>            | ASTC   | XP_013164626_1 |
| <i>Danaus plexippus</i>          | ASTC   | XP_032517390_1 |
| <i>Mythimna unipuncta</i>        | ASTC   | AAA93257_1     |
| <i>Papilio machaon</i>           | ASTC   | XP_014367295_1 |
| <i>Agrotis ipsilon</i>           | ASTC   | C0HKS0_1       |
| <i>Manduca sexta</i>             | ASTC   | XP_030040870_1 |
| <i>Cydia pomonella</i>           | ASTC   | QDK59880_1     |
| <i>Rhagoletis zephyria</i>       | ASTC   | XP_017473348_1 |
| <i>Papilio polytes</i>           | ASTC   | XP_013145137_1 |
| <i>Spodoptera exigua</i>         | ASTC   | AXY04234_1     |
| <i>Lucilia cuprina</i>           | ASTC   | XP_023293632_1 |
| <i>Asbolus verrucosus</i>        | ASTC   | RZC32467_1     |
| <i>Nicrophorus vespilloides</i>  | ASTC   | XP_017776616_1 |
| <i>Parasteatoda tepidariorum</i> | ASTC   | XP_015908718_1 |
| <i>Parasteatoda tepidariorum</i> | ASTC   | XP_015908719_1 |

|                                    |       |                |
|------------------------------------|-------|----------------|
| <i>Parasteatoda tepidariorum</i>   | ASTC  | XP_015908717_1 |
| <i>Pieris rapae</i>                | ASTC  | XP_022129619_1 |
| <i>Anoplophora glabripennis</i>    | ASTC  | XP_018572075_1 |
| <i>Trichoplusia ni</i>             | ASTC  | XP_026734642_1 |
| <i>Daphnia magna</i>               | ASTC  | KZS12162_1     |
| <i>Contarinia nasturtii</i>        | ASTC  | XP_031623836_1 |
| <i>Rhynchophorus ferrugineus</i>   | ASTC  | QGA72540_1     |
| <i>Culex pipiens</i>               | ASTC  | AHG94988_1     |
| <i>Aethina tumida</i>              | ASTC  | XP_019881141_1 |
| <i>Dendroctonus ponderosae</i>     | ASTC  | XP_019760338_1 |
| <i>Lingula anatina</i>             | ASTC  | XP_013393587.1 |
| <i>Novocrania anomala</i>          | ASTC  | (6)            |
| <i>Cephalothrix hongkongiensis</i> | ASTC  | (6)            |
| <i>Tubulanus polymorphus</i>       | ASTC  | (6)            |
| <i>Lineus Longissimus</i>          | ASTC1 | (6)            |
| <i>Cerebratulus spec</i>           | ASTC1 | (6)            |
| <i>Lineus lacteus</i>              | ASTC1 | (6)            |
| <i>Lineus ruber</i>                | ASTC1 | (6)            |
| <i>Riseriellus occultus</i>        | ASTC  | (6)            |
| <i>Cerebratulus marginatus</i>     | ASTC  | (6)            |
| <i>Malacobdella grossa</i>         | ASTC  | (6)            |
| <i>Notospermus geniculatus</i>     | ASTC  | (6)            |
| <i>Cerebratulus spec</i>           | ASTC2 | (6)            |
| <i>Lineus lacteus</i>              | ASTC2 | (6)            |
| <i>Lineus longissimus</i>          | ASTC2 | (6)            |
| <i>Lineus ruber</i>                | ASTC2 | (6)            |
| <i>Nipponemertes spec</i>          | ASTC  | (6)            |
| <i>Homo sapiens</i>                | UII   | NP_006777.1    |
| <i>Homo sapiens</i>                | UII   | NP_068835.1    |
| <i>Danio rerio</i>                 | UII   | NP_998013.2    |
| <i>Rattus norvegicus</i>           | UII   | NP_062033.1    |
| <i>Pelophylax ridibundus</i>       | UII   | P33715.2       |
| <i>Rattus norvegicus</i>           | UII   | NP_596876.2    |
| <i>Sus scrofa</i>                  | UII   | NP_999308.1    |
| <i>Macaca mulatta</i>              | UII   | NP_001028067.1 |
| <i>Phaethon lepturus</i>           | UII   | XP_010282914.1 |
| <i>Macaca mulatta</i>              | UII   | XP_028699396.1 |
| <i>Vulpes vulpes</i>               | UII   | XP_025862965.1 |
| <i>Callorhinus ursinus</i>         | UII   | XP_025724981.1 |

|                                |     |                |
|--------------------------------|-----|----------------|
| <i>Takifugu rubripes</i>       | UII | NP_001072085.1 |
| <i>Cariama cristata</i>        | UII | XP_009698098.1 |
| <i>Xenopus laevis</i>          | UII | NP_001267509.1 |
| <i>Ovis aries</i>              | UII | XP_027821791.1 |
| <i>Gasterosteus aculeatus</i>  | UII | ALD51541.1     |
| <i>Tetraodon nigroviridis</i>  | UII | ALD51540.1     |
| <i>Aptenodytes forsteri</i>    | UII | KFM09588.1     |
| <i>Corvus brachyrhynchos</i>   | UII | KFO54906.1     |
| <i>Homo_sapiens</i>            | URP | BAC98929.1     |
| <i>Rattus_norvegicus</i>       | URP | NP_937766.1    |
| <i>Mus_musculus</i>            | URP | NP_937809.1    |
| <i>Danio_rerio</i>             | URP | NP_001245247.1 |
| <i>Danio_rerio</i>             | URP | NP_001076411.1 |
| <i>Hippoglossus stenolepis</i> | URP | XP_035006504.1 |
| <i>Epinephelus lanceolatus</i> | URP | XP_033471682.1 |
| <i>Anguilla japonica</i>       | URP | BAJ51782.1     |
| <i>Homo sapiens</i>            | MCH | AAA63214.1     |
| <i>Mus_musculus</i>            | MCH | NP_084247.1    |
| <i>Oreochromis_mossambicus</i> | MCH | P49794.1       |
| <i>Oncorhynchus keta</i>       | MCH | P19713.1       |



| Neuro-peptide | Nervous system |        |         |         |    | Digestive system |    |    |    |    | Locomotory systems |        |    |
|---------------|----------------|--------|---------|---------|----|------------------|----|----|----|----|--------------------|--------|----|
|               | RNC Ec         | RNC Hy | CONR Ec | CONR Hy | PM | Es               | CS | PS | PD | PC | TF Pod             | TF Amp | AM |
| ArSS1         | ✓              | ✓      | ✓       | ✓       | ✓  | ✓                | ✓  | ✓  | ✓  | ✓  | ✓                  | ✓      | ✓  |
| ArSS2         | ✓              | ✓      | ✓       | ✓       | ✓  |                  | ✓  | ✓  | ✓  | ✓  | ✓                  |        |    |
| NGFFYa (*)    | ✓              |        | ✓       |         |    |                  | ✓  | ✓  | ✓  |    | ✓                  |        | ✓  |
| ArSK/CCK1,2   | ✓              | ✓      | ✓       | ✓       | ✓  | ✓                | ✓  | ✓  | ✓  | ✓  | ✓                  |        | ✓  |
| ArGnRH        | ✓              | ✓      | ✓       | ✓       | ✓  | ✓                | ✓  | ✓  | ✓  | ✓  | ✓                  |        | ✓  |
| ArCRZ (*)     | ✓              |        | ✓       |         |    |                  | ✓  | ✓  | ✓  |    | ✓                  |        | ✓  |
| Asterotocin   | ✓              |        | ✓       |         | ✓  | ✓                | ✓  | ✓  | ✓  |    | ✓                  |        | ✓  |
| SALMFa1 (+)   | ✓              | ✓      | ✓       | ✓       |    | ✓                | ✓  | ✓  |    | ✓  | ✓                  |        | ✓  |
| SALMFa2 (+)   | ✓              |        | ✓       |         |    | ✓                | ✓  | ✓  |    | ✓  | ✓                  |        |    |
| ArPPLN1b/SMP  | ✓              | ✓      | ✓       | ✓       | ✓  | ✓                | ✓  | ✓  | ✓  | ✓  | ✓                  | ✓      | ✓  |
| ArPPLN2h      | ✓              | ✓      | ✓       | ✓       | ✓  | ✓                | ✓  | ✓  | ✓  | ✓  | ✓                  | ✓      |    |
| ArLQ (*)      | ✓              |        | ✓       |         |    |                  | ✓  | ✓  |    |    | ✓                  |        |    |
| ArCT          | ✓              | ✓      | ✓       | ✓       | ✓  | ✓                | ✓  | ✓  | ✓  | ✓  | ✓                  | ✓      | ✓  |
| ArCRH         | ✓              | ✓      | ✓       | ✓       | ✓  | ✓                | ✓  | ✓  | ✓  | ✓  | ✓                  | ✓      | ✓  |

**KEY:**

✓ = expression reported

*In vitro* pharmacological effects reported = Myoexcitatory effect Myoinhibitory effect No effect

**Table S3 Comparison of the expression patterns and pharmacological actions of ArSS1, ArSS2 and other neuropeptides that have been characterised in *Asterias rubens*.** Reports of expression are based on use of mRNA *in situ* hybridisation and immunohistochemical methods, with the exception of neuropeptides labelled with an asterisk (\*) where only mRNA *in situ* hybridisation has been employed and neuropeptides labelled with a cross (+) where only immunohistochemistry has been employed. Anatomical abbreviations: AM, apical muscle; CONR Ec; circumoral nerve ring ectoneural region; CONR Hy, circumoral nerve ring hyponeural region; CS, cardiac stomach; Es, esophagus; PC, pyloric caeca; PD, pyloric duct; PM, peristomial membrane; PS, pyloric stomach; RNC Ec; radial nerve cord ectoneural region; RNC Hy radial nerve cord hyponeural region; TF Amp, tube foot ampulla; TF Pod, tube foot podium. The findings summarised in this table are derived from the following publications, which are listed below: ArSS1 (this paper); ArSS2 (11); NGFFYamide (12); ArSK/CCK1,2 (13); ArGnRH (14); ArCRZ (14); Asterotocin (15); SALMFamide-1 (16-18); SALMFamide-2 (17-20); ArPPLN1b/SMP (21); ArPPLN2h (22); ArLQ (23); ArCT (24); ArCRH (25, 26).

## SI References

1. M. Zandawala *et al.*, Discovery of novel representatives of bilaterian neuropeptide families and reconstruction of neuropeptide precursor evolution in ophiuroid echinoderms. *Open Biol* **7** (2017).
2. J. A. Veenstra, Allatostatins C, double C and triple C, the result of a local gene triplication in an ancestral arthropod. *Gen Comp Endocrinol* **230-231**, 153-157 (2016).
3. O. Mirabeau, J. S. Joly, Molecular evolution of peptidergic signaling systems in bilaterians. *Proc Natl Acad Sci U S A* **110**, E2028-2037 (2013).
4. S. Van Bael *et al.*, A *Caenorhabditis elegans* Mass Spectrometric Resource for Neuropeptidomics. *J Am Soc Mass Spectrom* **29**, 879-889 (2018).
5. F. M. McKay *et al.*, In silico analyses of neuropeptide-like protein (NLP) profiles in parasitic nematodes. *Int J Parasitol* 10.1016/j.ijpara.2021.07.002 (2021).
6. D. Thiel, L. A. Y. Guerra, M. Franz-Wachtel, A. Hejnol, G. Jekely, Nemertean, brachiopod and phoronid neuropeptidomics reveals ancestral spiralian signalling systems. *Mol Biol Evol* 10.1093/molbev/msab211 (2021).
7. D. C. Semmens *et al.*, Transcriptomic identification of starfish neuropeptide precursors yields new insights into neuropeptide evolution. *Open Biol* **6**, 150224 (2016).
8. H. Tostivint *et al.*, Molecular evolution of GPCRs: Somatostatin/urotensin II receptors. *J Mol Endocrinol* **52**, T61-86 (2014).
9. Y. Q. Dong, Z. Y. Wang, T. Z. Jing, Functional characterization of ASTC (allatostatin C) and ASTCC (allatostatin double C) in *Clostera anastomosis* (Lepidoptera: Notodontidae). *Gene* **598**, 1-8 (2017).
10. J. A. Veenstra, Allatostatin C and its paralog allatostatin double C: the arthropod somatostatins. *Insect Biochem Mol Biol* **39**, 161-170 (2009).
11. Y. Zhang *et al.*, Molecular and functional characterization of somatostatin-type signalling in a deuterostome invertebrate. *Open Biol* **10**, 200172 (2020).
12. A. B. Tinoco *et al.*, Characterization of NGFFYamide Signaling in Starfish Reveals Roles in Regulation of Feeding Behavior and Locomotory Systems. *Front Endocrinol (Lausanne)* **9**, 507 (2018).
13. A. B. Tinoco *et al.*, Ancient role of sulfakinin/cholecystokinin-type signalling in inhibitory regulation of feeding processes revealed in an echinoderm. *Elife* **10** (2021).
14. S. Tian, M. Egertova, M. R. Elphick, Functional Characterization of Paralogous Gonadotropin-Releasing Hormone-Type and Corazonin-Type Neuropeptides in an Echinoderm. *Front Endocrinol (Lausanne)* **8**, 259 (2017).
15. E. A. Odekunle *et al.*, Ancient role of vasopressin/oxytocin-type neuropeptides as regulators of feeding revealed in an echinoderm. *BMC Biol* **17**, 60 (2019).
16. S. J. Moore, M. C. Thorndyke, Immunocytochemical mapping of the novel echinoderm neuropeptide SALMFamide 1 (S1) in the starfish *Asterias rubens*. *Cell Tissue Res* **274**, 605-618 (1993).
17. R. Melarange, M. R. Elphick, Comparative analysis of nitric oxide and SALMFamide neuropeptides as general muscle relaxants in starfish. *J Exp Biol* **206**, 893-899 (2003).
18. R. Melarange, D. J. Potton, M. C. Thorndyke, M. R. Elphick, SALMFamide neuropeptides cause relaxation and eversion of the cardiac stomach in starfish. *Proc Biol Sci* **266**, 1785-1789 (1999).
19. S. J. Newman, M. R. Elphick, M. C. Thorndyke, Tissue distribution of the SALMFamide neuropeptides S1 and S2 in the starfish *Asterias rubens* using novel monoclonal and polyclonal antibodies. I. Nervous and locomotory systems. *Proc Biol Sci* **261**, 139-145 (1995).
20. S. J. Newman, M. R. Elphick, M. C. Thorndyke, Tissue distribution of the SALMFamide neuropeptides S1 and S2 in the starfish *Asterias rubens* using novel monoclonal and polyclonal antibodies. II. Digestive system. *Proc Biol Sci* **261**, 187-192 (1995).

21. M. Lin, M. Egertova, C. G. Zampronio, A. M. Jones, M. R. Elphick, Pedal peptide/orcokinin-type neuropeptide signaling in a deuterostome: The anatomy and pharmacology of starfish myorelaxant peptide in *Asterias rubens*. *J Comp Neurol* **525**, 3890-3917 (2017).
22. M. Lin, M. Egertova, C. G. Zampronio, A. M. Jones, M. R. Elphick, Functional characterization of a second pedal peptide/orcokinin-type neuropeptide signaling system in the starfish *Asterias rubens*. *J Comp Neurol* **526**, 858-876 (2018).
23. L. A. Yanez-Guerra *et al.*, Discovery and functional characterisation of a luqin-type neuropeptide signalling system in a deuterostome. *Sci Rep* **8**, 7220 (2018).
24. W. Cai *et al.*, Biochemical, Anatomical, and Pharmacological Characterization of Calcitonin-Type Neuropeptides in Starfish: Discovery of an Ancient Role as Muscle Relaxants. *Front Neurosci* **12**, 382 (2018).
25. W. Cai (2018) Discovery and functional characterisation of calcitonin-type and CRH-type neuropeptide signalling systems in an echinoderm. PhD thesis. in *School of Biological & Chemical Sciences* (Queen Mary University of London, London, UK), p 316.
26. W. Cai, M. Egertova, C. G. Zampronio, A. M. Jones, M. R. Elphick, Molecular identification and cellular localisation of a corticotropin-releasing hormone type neuropeptide in an echinoderm. *Neuroendocrinology* 10.1159/000517087 (2021).
